# Supplementary material
Source: PubMed Central journal article supplement (PMC5828168)
Supplement: NIHMS940310-supplement-1.pdf [file NIHMS940310-supplement-1.pdf]

## **SUPPLEMENTARY DATA**

### **Arterial Stiffness and risk of Overall Heart Failure, Heart Failure with Preserved Ejection Fraction, and Heart Failure with Reduced Ejection Fraction: The Health ABC Study**

Ambarish Pandey, MD; <sup>1\*</sup> Hassan Khan, MD, PhD; <sup>2\*</sup> Anne B. Newman, MD, MPH; <sup>3</sup> Edward G. Lakatta, MD; <sup>4</sup> Daniel E. Forman, MD; <sup>5</sup> Javed Butler, MD; <sup>6</sup> Jarett D. Berry, MD, MS <sup>1,7</sup>

#### *\*Equal Contributions*

<sup>1</sup> Division of Cardiology, Department of Internal Medicine, University of Texas Southwestern Medical Center, Dallas, TX

<sup>2</sup> Department of Internal Medicine, Emory University School of Medicine, Atlanta, GA

<sup>3</sup> Department of Epidemiology, Graduate School of Public Health at University of Pittsburgh, Pittsburgh, PA

<sup>4</sup> Laboratory of Cardiovascular Science, Biomedical Research Center, National Institute of Health, National Institute of Aging, Baltimore, MD, USA

<sup>5</sup> Section of Geriatric Cardiology, Divisions of Geriatrics and Cardiology, University of Pittsburgh School of Medicine, VA Pittsburgh Healthcare System, Pittsburgh, PA

<sup>6</sup> Division of Cardiology, Department of Internal Medicine, Stony Brook University School of Medicine, New York, New York, NY

<sup>7</sup> Department of Clinical Sciences, University of Texas Southwestern Medical Center, Dallas, TX

**Table S1:** Association between categorical and continuous measures of carotid-femoral pulse wave velocity and risk of heart failure among participants without cardiovascular disease at baseline

| Outcome                                                                                                                                                                                                                                                                                                | Hazard Ratio<br>(95% CI)<br>Cf-PWV Tertile 1 | Hazard Ratio<br>(95% CI)<br>Cf-PWV Tertile 2 | Hazard Ratio<br>(95% CI)<br>Cf-PWV Tertile 3 | Hazard Ratio<br>(95% CI) per<br>Log 2 higher<br>Cf-PWV |
|--------------------------------------------------------------------------------------------------------------------------------------------------------------------------------------------------------------------------------------------------------------------------------------------------------|----------------------------------------------|----------------------------------------------|----------------------------------------------|--------------------------------------------------------|
| Heart Failure                                                                                                                                                                                                                                                                                          | Ref.                                         | 0.81<br>(0.58 – 1.13)                        | 1.11<br>(0.81 – 1.53)                        | 1.12<br>(0.89 – 1.42)                                  |
| <p>Model adjusted for age, sex, mean arterial pressure, body mass index, education status, diabetes, smoking, drinking status, physical activity, and renal function</p> <p>Separate multivariable adjusted models were constructed for categorical and continuous measures of pulse wave velocity</p> |                                              |                                              |                                              |                                                        |

**Table S2:** Association between categorical and continuous measures of carotid-femoral pulse wave velocity and risk of heart failure outcomes after additional adjustment for interval incidence of coronary heart disease and treating death as a competing risk.

| Outcome           | Hazard Ratio (95% CI) Tertile 1 | Hazard Ratio (95% CI) Tertile 2 | Hazard Ratio (95% CI) Tertile 3 | Hazard Ratio (95% CI) per Log 2 |
|-------------------|---------------------------------|---------------------------------|---------------------------------|---------------------------------|
| <b>Overall HF</b> | Ref.                            | 0.88<br>(0.68-1.15)             | 1.06<br>(0.82-1.37)             | 1.04<br>(0.85-1.26)             |
| <b>HFpEF</b>      | Ref.                            | 0.72<br>(0.48-1.09)             | 0.96<br>(0.64-1.42)             | 0.92<br>(0.66-1.28)             |
| <b>HFrEF</b>      | Ref.                            | 1.12<br>(0.72-1.74)             | 1.15<br>(0.74-1.79)             | 1.04<br>(0.79-1.37)             |

HF: Heart failure; HFpEF: Heart failure with preserved ejection fraction; HFrEF: Heart failure with reduced ejection fraction.

Separate multivariable adjusted models were constructed for categorical and continuous measures of pulse wave velocity and for each HF outcome

Models adjusted for age, sex, ethnicity, heart rate, mean arterial blood pressure, Body mass index, coronary heart disease at baseline, education status, anti-HTN use, diabetes, smoking, drinking status, physical activity, renal function, incident coronary heart disease on follow-up as a time varying covariate, and death as a competing risk

#

#

**Figure S1:** Subgroup analysis showing the association between carotid-femoral pulse wave velocity and risk of heart failure across sex, body mass index, and physical activity categories.

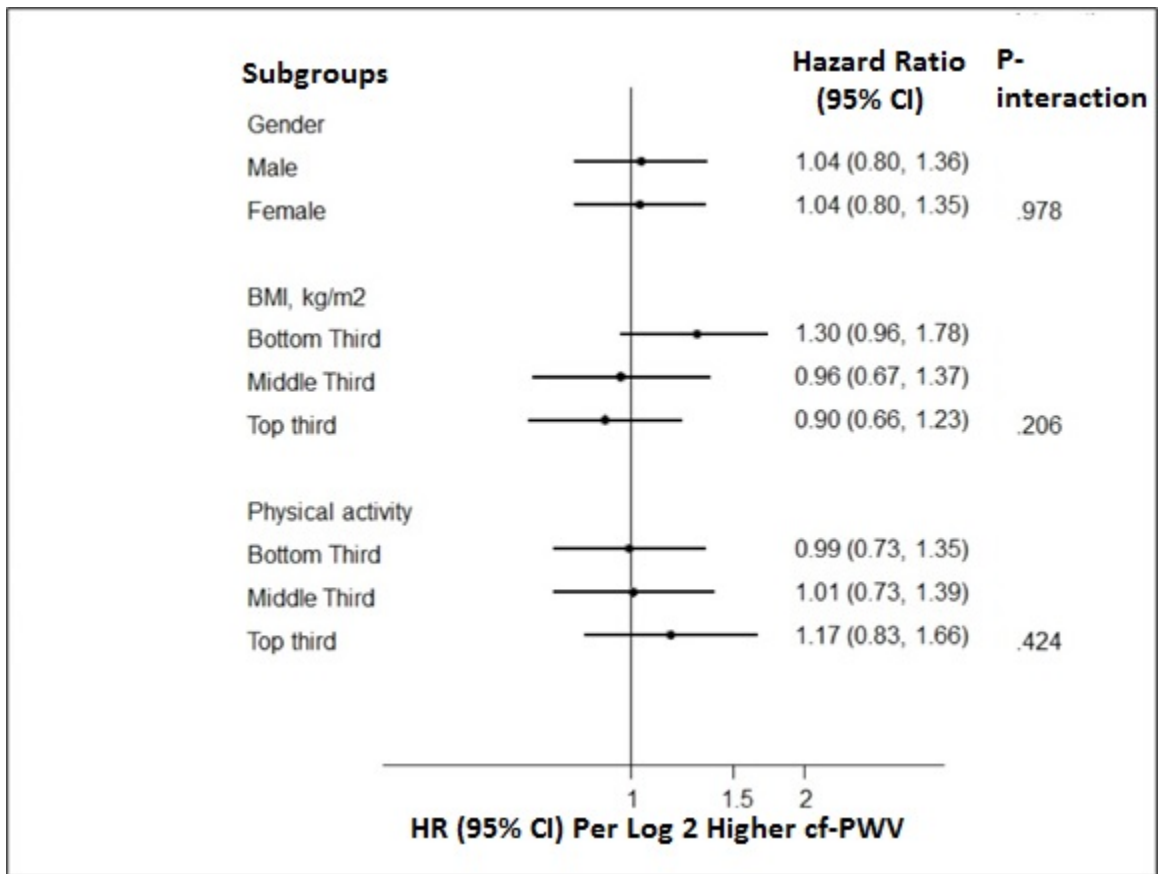

#

#

#

#

#

#
